# Supplementary material
Source: bioRxiv or medRxiv preprint supplement (https://medrxiv.org/highwire/filestream/93114/field_highwire_adjunct_files/2/2020.08.11.20172809-3.pdf)

## Supplemental Figure 2: Effect of Noise on Federated MLP Model Training.

**A**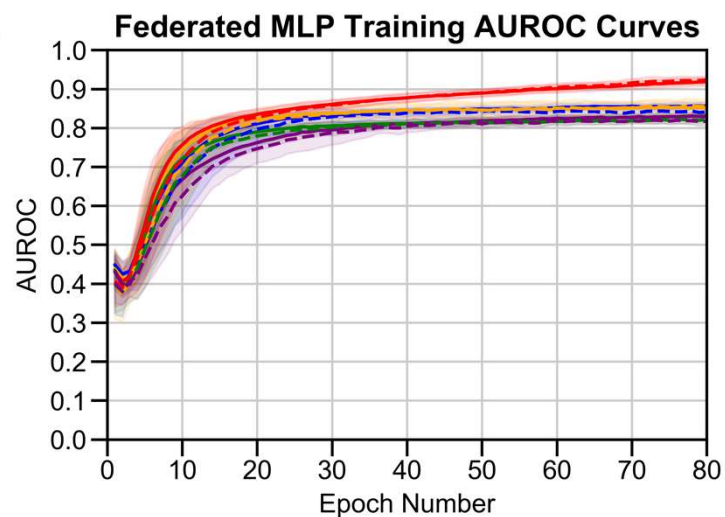**B**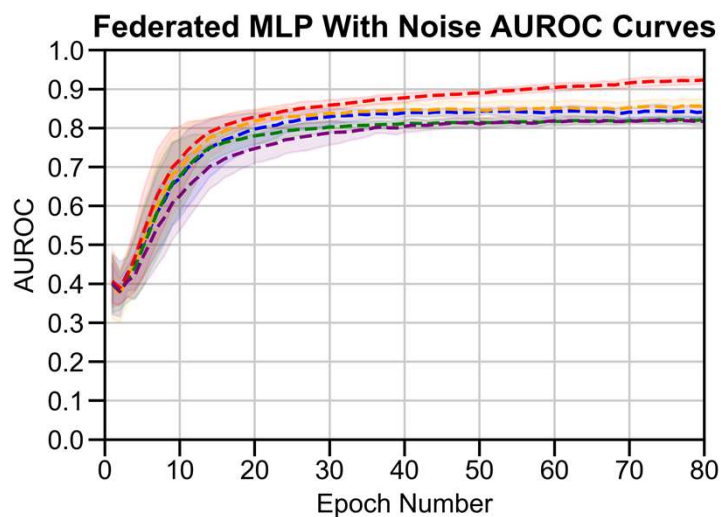**C**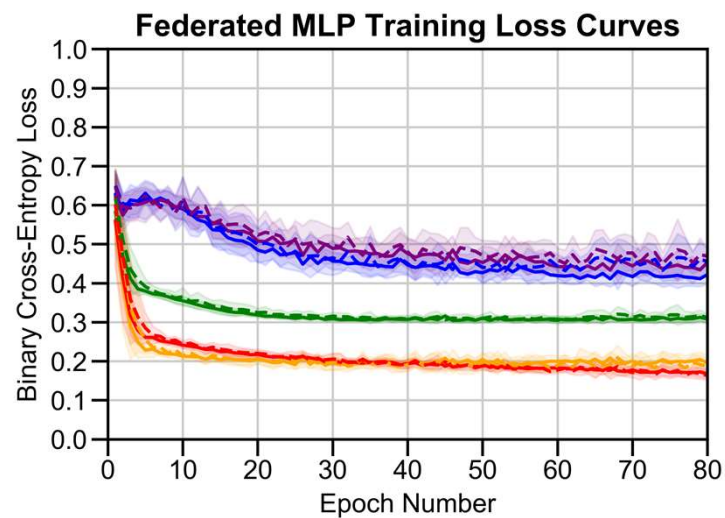**D**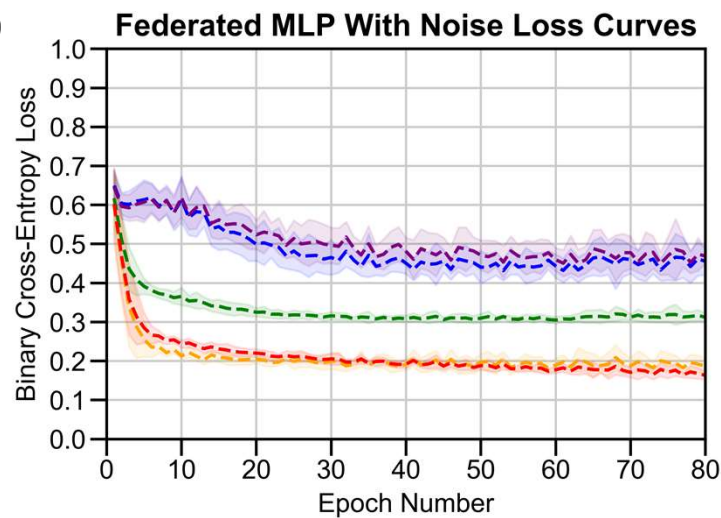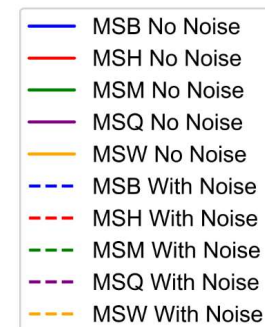

Supplement: Supplementary file [file 2020.08.11.20172809-3.pdf]
